# Supplementary material
Source: Springer Nature journal article supplement (https://www.springermedizin.de/resource/supplementary/12889_2007_1165_MOESM5_ESM.pdf/9502594)

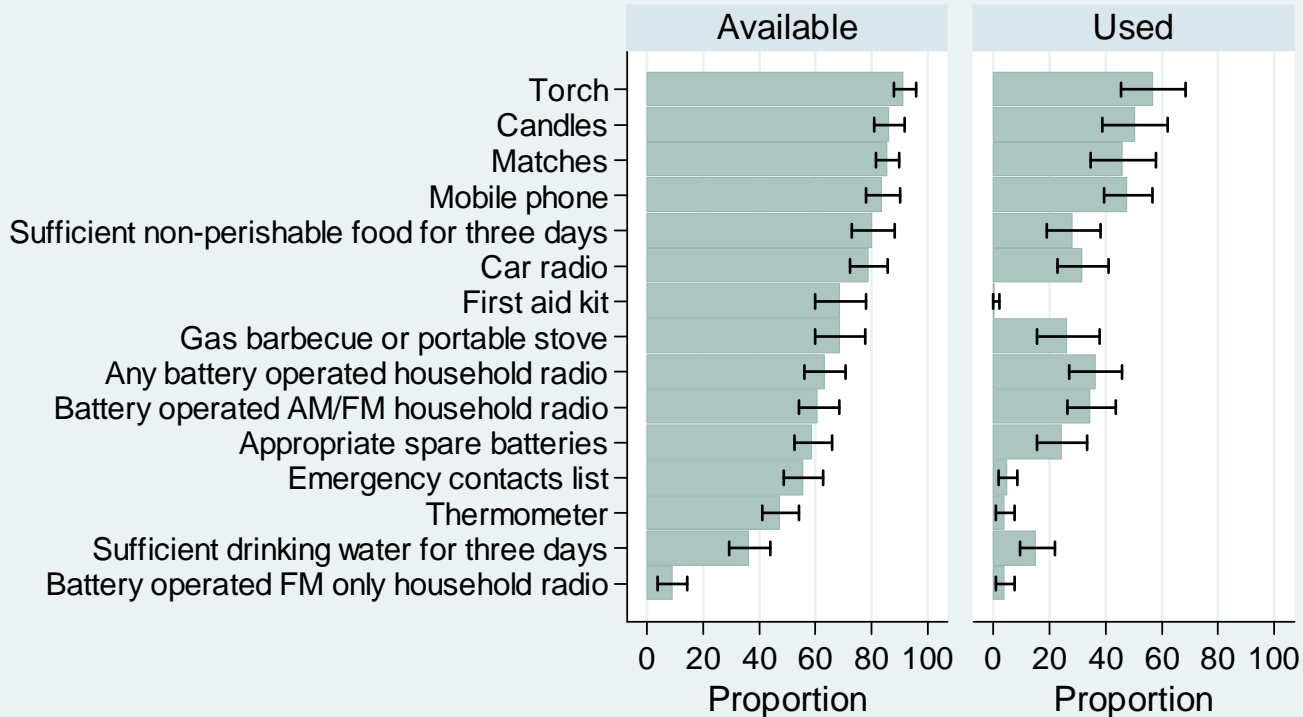

Error bars indicate 95% confidence intervals

Supplement: MOESM5 [file 9502594]
